# Supplementary material for: Genomic Portrait of Community-Associated Methicillin-Resistant Staphylococcus Aureus ST772-SCCmec V&nbsp;Lineage From India
Source: Research Square preprint supplement (doi:10.21203/rs.3.rs-141678/v1), 2021-01-12
Supplement: Supplementary file 2 [file e216a3c53976eb0789d1200b.docx]

**Table S1**: Clonal complex, single locus and double locus variant of sequence types identified in MRSA.

| **Clonal complex (CC)** | ***Arc*** | ***aro*E** | ***glp*P** | ***gmK*** | ***pta*** | ***tpi*** | ***ypi*** | **ST** |
| --- | --- | --- | --- | --- | --- | --- | --- | --- |
| CC1 | 1 | 1 | 1 | 1 | 1 | 1 | 1 | 1 |
| 1 | 1 | 1 | 1 | 22 | 1 | 1 | ST772 |
| CC22 | 7 | 6 | 1 | 5 | 8 | 8 | 6 | ST22 |
| 7 | 59 | 1 | 5 | 8 | 8 | 6 | ST1037 |
| 7 | 6 | 1 | 5 | 8 | 5 | 6 | ST217 |
| 258 | 6 | 1 | 5 | 8 | 8 | 6 | ST2371 |
| 464 | 6 | 1 | 5 | 8 | 8 | 6 | ST3976 |
| 7 | 4 | 1 | 5 | 8 | 5 | 6 | ST636 |
| 2 | 6 | 1 | 5 | 8 | 8 | 6 | ST896 |
| CC5 | 1 | 4 | 1 | 4 | 12 | 1 | 10 | ST5 |
| 12 | 4 | 1 | 4 | 12 | 1 | 3 | ST6 |
| 1 | 4 | 1 | 1 | 11 | 1 | 3 | ST1290 |
| 1 | 4 | 1 | 5 | 12 | 1 | 10 | ST1307 |
| 1 | 4 | 1 | 4 | 12 | 1 | 5 | ST801 |
| CC8 | 3 | 3 | 1 | 1 | 4 | 4 | 3 | ST8 (USA300) |
| 3 | 6 | 1 | 1 | 4 | 4 | 3 | ST1803 |
| 2 | 3 | 1 | 1 | 4 | 4 | 3 | ST239 |
| 2 | 3 | 1 | 1 | 4 | 65 | 3 | ST368 |
| 12 | 3 | 1 | 1 | 4 | 4 | 3 | ST630 |
| 2 | 3 | 1 | 1 | 413 | 4 | 3 | ST3324 |
| CC672 | 4 | 3 | 1 | 1 | 11 | 72 | 11 | ST672 |
| 4 | 3 | 1 | 1 | 11 | 72 | 64 | ST361 |
| 4 | 402 | 1 | 1 | 11 | 72 | 11 | ST2775 |
| CC72 | 1 | 4 | 1 | 8 | 4 | 4 | 3 | ST72 |
| CC30 | 2 | 2 | 2 | 2 | 6 | 179 | 2 | ST1482 |
| 2 | 2 | 2 | 2 | 6 | 3 | 69 | ST382 |
| CC121 | 6 | 5 | 1 | 2 | 7 | 4 | 5 | ST1358 |
| 6 | 5 | 6 | 2 | 7 | 14 | 85 | ST649 |
| CC580 | 3 | 35 | 48 | 19 | 20 | 26 | 39 | ST580 |
| CC88 | 22 | 1 | 14 | 23 | 12 | 4 | 31 | ST88 |
| Singleton | 1 | 6 | 1 | 5 | 8 | 8 | 64 | ST1947 |
| 7 | 6 | 1 | 5 | 13 | 8 | 3 | ST616 |
| 12 | 1 | 37 | 15 | 11 | 1 | 40 | ST1598 |
